# Supplementary material
Source: HighWire-hosted journal article supplement (http://thorax.bmjjournals.com/highwire/filestream/173990/field_highwire_adjunct_files/4/62121088webonlyapp5.pdf)
Supplement: 62121088webonlyapp5.pdf [file 62121088webonlyapp5.pdf]

**Supplementary Table 4.** % Excess relative risks (95% credible intervals) for a 10 ppb increase in sulphur dioxide concentrations, respiratory mortality, 0-4 year exposure window, adjusted for urban-rural status.

| Carstairs decile | Mortality period 1 <sup>a</sup> |                          |                           | Mortality period 2 <sup>a</sup> |                          |                           | Mortality period 3 <sup>a</sup> |                          |                           | Mortality period 4 <sup>a</sup> |                          |                           |
|------------------|---------------------------------|--------------------------|---------------------------|---------------------------------|--------------------------|---------------------------|---------------------------------|--------------------------|---------------------------|---------------------------------|--------------------------|---------------------------|
|                  | No. of wards                    | Excess relative risk (%) | (95% CI)                  | No. of wards                    | Excess relative risk (%) | (95% CI)                  | No. of wards                    | Excess relative risk (%) | (95% CI)                  | No. of wards                    | Excess relative risk (%) | (95% CI)                  |
| 1                | 42                              | 58.7                     | (29.9, 93.9)              | 18                              | 33.1                     | (-11.5, 100.2)            | 13                              | -11.4                    | (-49.1, 54.2)             | 7                               | -6.1                     | (-46.5, 64.8)             |
| 2                | 39                              | 6.3                      | (-27.7, 56.3)             | 14                              | 2.5                      | (-49.5, 108.0)            | 10                              | 5.6                      | (-53.7, 140.8)            | 6                               | -12.7                    | (-68.3, 140.2)            |
| 3                | 38                              | -2.1                     | (-31.4, 39.6)             | 16                              | 3.8                      | (-48.8, 110.5)            | 15                              | 7.3                      | (-54.2, 151.6)            | 9                               | 24.3                     | (-50.8, 213.9)            |
| 4                | 40                              | 11.9                     | (-22.6, 61.9)             | 17                              | 40.2                     | (-36.4, 209.0)            | 16                              | 9.6                      | (-58.3, 188.0)            | 14                              | -5.6                     | (-67.5, 174.5)            |
| 5                | 43                              | 11.8                     | (-19.8, 55.8)             | 20                              | -12.0                    | (-56.2, 77.0)             | 16                              | 29.2                     | (-47.0, 214.9)            | 9                               | 45.0                     | (-44.0, 275.1)            |
| 6                | 37                              | -3.5                     | (-33.0, 39.0)             | 20                              | 4.9                      | (-44.3, 97.7)             | 23                              | 10.1                     | (-52.6, 156.0)            | 14                              | 40.5                     | (-42.1, 241.3)            |
| 7                | 32                              | -5.3                     | (-32.4, 32.8)             | 23                              | 7.9                      | (-42.3, 101.8)            | 31                              | 25.9                     | (-43.6, 180.7)            | 23                              | 18.8                     | (-48.1, 171.9)            |
| 8                | 43                              | 14.6                     | (-17.8, 59.8)             | 27                              | 12.1                     | (-40.0, 109.3)            | 19                              | 16.6                     | (-49.2, 167.3)            | 11                              | 39.1                     | (-43.1, 240.1)            |
| 9                | 36                              | 21.5                     | (-12.2, 68.3)             | 20                              | 7.1                      | (-44.1, 105.2)            | 21                              | 5.9                      | (-53.6, 141.5)            | 13                              | 12.7                     | (-53.4, 172.6)            |
| 10               | 43                              | 25.1                     | (-10.0, 74.0)             | 31                              | -9.6                     | (-54.3, 79.0)             | 21                              | 3.6                      | (-56.1, 144.4)            | 12                              | 48.2                     | (-45.4, 302.1)            |
|                  | <b>N=393</b>                    |                          | <b>P=0.02<sup>b</sup></b> | <b>N=206</b>                    |                          | <b>P=0.91<sup>b</sup></b> | <b>N=185</b>                    |                          | <b>P=0.93<sup>b</sup></b> | <b>N=118</b>                    |                          | <b>P=0.87<sup>b</sup></b> |

<sup>a</sup> Mortality period 1; 1982-86, period 2; 1986-90, period 3; 1990-94, period 4; 1994-98.

<sup>b</sup> P-values correspond to test for interaction using likelihood based GLM.
